# Supplementary material for: Complex Feline Disease Mapping Using a Dense Genotyping Array
Source: Front Vet Sci. 2022 Jun 16;9:862414. doi: 10.3389/fvets.2022.862414 (PMC9244801; doi:10.3389/fvets.2022.862414)
Supplement: Supplementary file 1 [file Table_1.XLSX]

## Sheet: Sheet1
S1 Table. Significant association LMM GWAS results on chromosome X for the presence of orange fur in random bred cats.
Bp	P-value	Genes
110230748	1.79e-102	ENOX2
111210151	5.45e-42	FRMD7
103396485	6.17e-32	GRIA3
105432687	3.1e-30	intergenic
104993315	2.33e-27	intergenic
111410362	4.02e-18	intergenic
110863787	3.23e-17	intergenic
110613196	6.1e-17	IGSF1
110289746	1.26e-16	ENOX2
110996435	4.76e-15	intergenic
111194038	5.6e-15	STK26
111184276	5.91e-15	STK26
110697406	1.81e-14	intergenic
106380346	1.83e-13	PRR32
111862776	2.14e-13	HS6ST2
110864981	7.16e-13	intergenic
110865033	7.16e-13	intergenic
108844233	7.81e-12	intergenic
105160651	1.76e-11	intergenic
110153918	1.89e-11	ENOX2
112136902	1.94e-11	intergenic
103440644	5e-08	intergenic
102884842	6.5e-08	intergenic
104743212	8.17e-08	TENM1
111842604	1.4e-07	HST6ST2
