# Supplementary material for: Complex Feline Disease Mapping Using a Dense Genotyping Array
Source: Front Vet Sci. 2022 Jun 16;9:862414. doi: 10.3389/fvets.2022.862414 (PMC9244801; doi:10.3389/fvets.2022.862414)
Supplement: Supplementary file 2 [file Table_2.XLSX]

## Sheet: Sheet1
S2 Table: Three most significant associations for each disease from the FarmCPU GWAS results
disease	chr	bp	P-value
HCM	E3	3583882	1.00x10-6
	A1	17480048	8.08x10-6
	A2	151694678	8.16x10-6
CKD	C1	150285513	2.70x10-6
	B1	127996431	6.21x10-6
	B3	13351089	1.84x10-5
chronic enteropathy	A1	70115617	5.71x10-6
	A1	39744502	6.04x10-6
	D4	24020909	1.12x10-5
DM	D4	83583678	2.55x10-7*
	20	10262378	3.31x10-6
	B4	48190950	3.74x10-6
hypercalcemia	C1	19508050	3.05x10-7^
	A1	202553362	3.07x10-6
	A1	109154165	3.55x10-6
hyperthyroidism	B2	121565607	1.36x10-7*
	D4	44014193	1.95x10-5
	C1	207199524	2.17x10-5
IBD	B4	10941073	9.54x10-8*
	C2	14832648	1.14x10-6
	C2	14676351	8.37x10-6
SCAL	D3	39814844	2.20x10-6
	A1	85978882	2.29x10-6
	B1	95205931	3.36x10-6
all GI	A1	85978882	1.07x10-6
	D3	39814844	6.08x10-6
	B2	53617737	7.29x10-6
FEK	E3	34663327	1.79x10-6
	A3	110819329	6.91x10-6
	A1	211086724	7.07x10-6
* significant association using Bonferroni-corrected threshold on all SNPs
^ suggestive associaton using Bonferroni-corrected threshold on unlinked SNPs
