# Supplementary material for: Complex Feline Disease Mapping Using a Dense Genotyping Array
Source: Front Vet Sci. 2022 Jun 16;9:862414. doi: 10.3389/fvets.2022.862414 (PMC9244801; doi:10.3389/fvets.2022.862414)
Supplement: Supplementary file 3 [file Table_3.XLSX]

## Sheet: Sheet1
S3 Table. Frequencies, odds ratios, and P-values for SNPs associated with complex diseases in different breeds and random bred cats.
disease	breed	No. cases, no. controls	SNP	allele	Freq cases, freq controls	P-value	Odds ratio
			Chr: bp
hyperthyroidism	DSH	240, 82	B2: 121,565,607	G	0.034, 0.110	1.9x10-4	0.28
	DLH	42, 13			0.060, 0.154	0.125	0.35
	Maine coon	4, 8			0.125, 0.375	0.204	0.24
	Persian	3, 4			0, 0	N/A	N/A
	Siamese	5, 4			0, 0.125	0.25	0
	Other breed	12, 22			0.042, 0.114	0.317	0.34
	Other mb	4, 1			0, 0	N/A	N/A
DM	DSH	48, 257	D4: 83,583,678	A	0.385, 0.179	5.5x10-6	2.88
	DLH	6, 43			0.250, 0.163	0.455	1.71
	Maine coon	2, 12			0.500, 0.083	0.027	11
	Other breed	11, 50			0.318, 0.170	0.113	2.28
	Other mb	0, 4			N/A, 0.125	N/A	N/A
FEK	DSH	10, 21	E3: 34,663,327	G	0.150, 0.667	1.4x10-4	0.09
	Maine coon	2, 3			0, 0.500	0.091	0
	Other breed	0, 10			N/A, 0.650	N/A	N/A
	Other mb	3, 6			0, 0.583	0.017	0
IBD	DSH	31, 12	B4: 10,941,073	G	0.232, 0.546	7.6x10-3	0.25
	DLH	5, 6			0.300, 0.750	0.035	0.14
	Maine coon	1, 3			0.500, 0.250	0.54	3
	Persian	3, 3			0, 0.500	0.053	0
	Other breed	5, 9			0.100, 0.444	0.061	0.14
	Other mb	2, 0			0.250, N/A	N/A	N/A
HCM	DSH	58, 24	E3: 3,583,882	C	0.285, 0.604	1.2x10-4	0.26
	DLH	11, 9			0.227, 0.556	0.033	0.24
	Siamese	2, 2			0.250, 0.500	0.465	0.33
	Other breed	12, 18			0.417, 0.639	0.09	0.4
hypercalcemia	DSH	16, 309	C1: 19,508,050	A	0.375, 0.091	3.0x10-7	6.02
	DLH	4, 55			0.250, 0.109	0.234	2.72
	Persian	3, 8			0.167, 0	0.095	N/A
	Other breed	2, 70			0, 0.050	0.647	0
	Other mb	0, 1			N/A, 0	N/A	N/A
Other mb = mixed-breed and domestic medium hair (DMH) and domestic longhair (DLH) if not included separately
