# Supplementary material for: Complex Feline Disease Mapping Using a Dense Genotyping Array
Source: Front Vet Sci. 2022 Jun 16;9:862414. doi: 10.3389/fvets.2022.862414 (PMC9244801; doi:10.3389/fvets.2022.862414)
Supplement: Supplementary file 4 [file Table_4.XLSX]

## Sheet: Sheet1
S4 Table. Non-significant associations identified for complex diseases using an LMM GWAS design.
Disease	Sample size (no. cases,	Chr: bp	P-value	Allele frequency (cases, controls)
	no. controls)
CKD	154, 62	C1: 150,285,513	6.77×10-6	0.105, 0.290
IBD	47, 33	B4: 10,941,073	2.75×10-6	0.216, 0.533
SCAL	78, 34	A1: 85,978,882	4.47×10-6	0.049, 0.250
chronic enteropathy	41, 28	B2: 102,276,323	6.59×10-6	0.110, 0.411
merged GI phenotypes	166, 34	A1: 85,978,882	1.90×10-6	0.069, 0.250
