# Supplementary material for: Complex Feline Disease Mapping Using a Dense Genotyping Array
Source: Front Vet Sci. 2022 Jun 16;9:862414. doi: 10.3389/fvets.2022.862414 (PMC9244801; doi:10.3389/fvets.2022.862414)
Supplement: Supplementary file 5 [file Table_5.XLSX]

## Sheet: Sheet1
S5 Table. Numbers of individual cats from each breed and random bred group for each phenotype.
	HCM		CKD		chronic enteropathy		hypercalcemia		hyperthyroidism		diabetes mellitus		FEK		IBD		SCAL		all GI		factorXII
breed	controls	cases	controls	cases	controls	cases	controls	cases	controls	cases	controls	cases	controls	cases	controls	cases	controls	cases	controls	cases	controls	cases
Abyssinian	2			1			3		1	1	1	2					2		2	1	1
american_bobtail	1		1		1		1				1		1		1		1		1		1
american_bobtail_shorthair							1			1	1
American_shorthair	1	2	2	1		2	2		1	1	3	1						2		4
Balinese				1		1	1		1	1	1	1								1
Bengal	4			1			1			2	2				2
British_shorthair				1			1		1		1
Burmese							1	1	1		1	1
devon_rex																1				1
DLH	9	11	5	22	6	2	55	4	13	42	43	6	6	1	6	5	6	6	6	13	6	2
DMH			1			1			1	2	2			2		1		1		3		1
DSH	24	58	46	101	12	29	309	16	82	240	257	48	21	10	12	31	12	59	12	116	15	14
egyptian_mau	2			1			1				2		1					1		1	1
Himalayan	1		2	4	1	2	5		6		3		1		1	1	1	1	1	5	1
Maine_coon		3	1	6	2	1	14		8	4	12	2	3	2	3	1	3	5	3	7	3	1
Maine_coon_mix																1				1
Manx				3			4	1	1	4	4							1		1
Munchkin_Longhair							1
Norwegian_Forest_Cat			1
Ocicat												1
oriental_shorthair		1	1		1		2		1		2		1		1		1		1		1
Persian	5	1		3	3		8	3	4	3	6	1	1		3	3	3		3	3	3
Ragdoll		1	1	2		1	2		1	1	5									1
Russian_Blue							1
Sable							1				1		1		1		1		1
Savanah							1				1
Siamese	2	2	1	5	1	1	19		4	5	11	1	2		1	2	2	1	2	4	1	1
Siamese_mix				2			1			2	2
Siberian		1							2			1				1		1		2
Snowshoe							1			1
Somali																				1
Sphynx	1	3			1		3		1		2		1		1		1		1		1
Tonkinese	1						4		4		2	1	1		1		1		1
Turkish_Angora						1			1			1								1
TOTAL	53	83	62	154	28	41	443	25	134	310	366	67	40	15	33	47	34	78	34	166	34	19
